# Supplementary material for: Insight into the photoelectric characteristics and photocatalytic water splitting performances of van der Waals heterostructures Cs 2 PbI 4 /MX 2 (M = Mo, W; X = Se, S)
Source: Royal Society of Chemistry journal article supplement (doi:10.1039/d5cp04273a), 2026-01-01
Supplement: d5cp04273a1.pdf [file d5cp04273a1.pdf]

Electronic Supplementary Information

**Insight into the photoelectric characteristic and photocatalytic  
water splitting in van der Waals heterostructures Cs<sub>2</sub>PbI<sub>4</sub>/MX<sub>2</sub>  
(M=Mo, W; X=Se, S)**

Wei-Bing Zhang,<sup>1,2</sup> Ai-Jie Mao<sup>2,\*</sup>, Hua-Yun Geng<sup>3</sup>, Xiang-Rong Chen<sup>2,\*</sup>

<sup>1</sup>School of Big Data and Artificial Intelligence, Chengdu Technological University, Chengdu

611730, China;

<sup>2</sup> College of Physics, Sichuan University, Chengdu 610064, China;

<sup>3</sup> National Key Laboratory for Shock Wave and Detonation Physics Research, Institute of Fluid

Physics, CAEP, Mianyang 621900, China

**Abstract**

The photoelectric characteristic and photocatalytic water splitting in van der Waals heterostructures Cs<sub>2</sub>PbI<sub>4</sub>/MX<sub>2</sub> (M=Mo, W; X=Se, S) were carried out based on first principle calculations. Four stable heterostructures were obtained with indirect narrow gaps. Among them, Cs<sub>2</sub>PbI<sub>4</sub>/MoSe<sub>2</sub>, Cs<sub>2</sub>PbI<sub>4</sub>/MoS<sub>2</sub> and Cs<sub>2</sub>PbI<sub>4</sub>/WSe<sub>2</sub> belong to type-II heterostructures, and Cs<sub>2</sub>PbI<sub>4</sub>/WS<sub>2</sub> is type-I heterostructure. High optical absorption efficiency and high carrier mobility imply that type-I heterostructure Cs<sub>2</sub>PbI<sub>4</sub>/WS<sub>2</sub> has a broad potential application prospect in light-emitting devices. Moreover, the optical absorption efficiency up to 10<sup>-5</sup>cm<sup>-1</sup>, the spatial separation interval of photogenerated electron-hole (~3.30), and type-II band edge alignment

---

\* Corresponding authors. E-mail: [scu\\_mij@126.com](mailto:scu_mij@126.com); [xrchen@scu.edu.cn](mailto:xrchen@scu.edu.cn)

mean that heterostructures are easy to realize electron-hole separation and transfer, reduce the recombination probability of electron and holes, and thus enabling solar energy conversion and highly efficient photocatalytic water splitting. Especially, Cs<sub>2</sub>PbI<sub>4</sub>/MoSe<sub>2</sub> heterostructure can trigger HER and OER reaction spontaneously at  $pH=0$  under equilibrium potential 1.23 V with a limiting reaction barrier of 1.16 eV for OER, which is close to 1.128 eV in WSe<sub>2</sub>/MoSe<sub>2</sub> heterojunction reported recently, implying that its may be an excellent photocatalyst. In addition, the limiting reaction barrier of Cs<sub>2</sub>PbI<sub>4</sub>/WSe<sub>2</sub> heterostructure is 1.27 V, low overpotential for OER is 0.31 V, and high power conversion efficiency indicating that it may have a potential applications in both solar cells and photocatalytic water splitting.

**Computational details** The Heyd-Scuseria-Ernzerhof (HSE06) hybrid functional included the SOC effect is employed in simulating the electric properties of heterostructures.<sup>1</sup> The cutoff energy was set to 350 eV, and the Convergence criteria for energy and force are set at 10<sup>-5</sup> eV and 0.002 eV/Å, respectively. The Brillouin zone grid is set to 6×4×1 for  $1 \times \sqrt{2} \text{Cs}_2\text{PbI}_4 / 2 \times \sqrt{7} \text{WSe}_2$ ,  $1 \times \sqrt{2} \text{Cs}_2\text{PbI}_4 / 2 \times \sqrt{7} \text{WSe}_2$ , and  $1 \times \sqrt{2} \text{Cs}_2\text{PbI}_4 / 2 \times \sqrt{7} \text{WSe}_2$  heterostructures, respectively.

The Gibbs free energies for the hydrogen evolution reaction (HER) and oxygen evolution reaction (OER) and are estimated by means of the model proposed by Nørskov et al.<sup>2-3</sup>

The HER can be driven along the following steps:

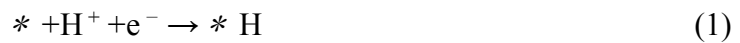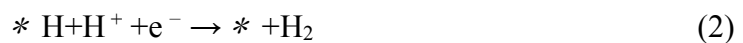

The corresponding free energy  $\Delta G_{*H}$  is obtained by the following formula:

$$\Delta G_{*H} = \Delta E_{*H} + \Delta E_{ZPE} - T\Delta S \quad (3)$$

$$\Delta E_{*H} = E_{*H} - E^* - 1/2 E_{H2} \quad (4)$$

where  $\Delta E_{*H}$  is the hydrogen chemisorption energy, where  $E_{*H}$ ,  $E^*$  and  $E_{H2}$  are the energies of absorbed slab, pure slab and  $H_2$  gas, respectively.

Moreover, the OER follows four elementary steps:

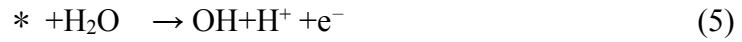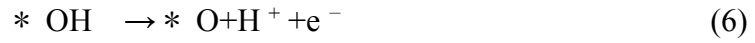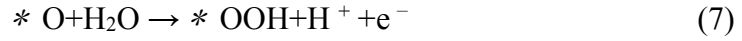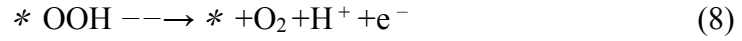

wherein,  $*$  represents the absorption site on the slab for intermediates.

The Gibbs reaction free energy ( $\Delta G$ ) of each step is estimated by the following formula:

$$\Delta G = \Delta E + \Delta E_{ZPE} - T\Delta S + \Delta G_U + \Delta G_{pH} \quad (9)$$

where,  $\Delta E$  is the total energy difference between reactants and products of reactions,  $\Delta E_{ZPE}$  is the zero point energy correction,  $\Delta S$  is the vibrational entropy change at finite temperature  $T$ ,  $\Delta G_U = -eU$  incorporates the effect of the electrode potential, where  $e$  is elementary charge,  $U$  is the electrode potential ( $U=1.23$ ),  $\Delta G_{pH}$  is the correction of the  $H^+$  free energy.  $pH = 0$  are employed in our calculations.

Table S1. The lattice parameters  $a$  and  $b$  of the optimized monolayers  $\text{Cs}_2\text{PbI}_4$  and  $\text{MX}_2$  with different size. And the lattice parameters  $a$ , and  $b$  of the constructed initial heterostructures  $\text{Cs}_2\text{PbI}_4/\text{MX}_2$  ( $\text{M}=\text{Mo}, \text{W}; \text{X}=\text{Se}, \text{S}$ ).

| Heterostructures                        | Configurations                           | $\text{Cs}_2\text{PbI}_4$ |                 | $\text{MX}_2$   |                 | initial heterostructures |                 |
|-----------------------------------------|------------------------------------------|---------------------------|-----------------|-----------------|-----------------|--------------------------|-----------------|
|                                         |                                          | $a(\text{\AA})$           | $b(\text{\AA})$ | $a(\text{\AA})$ | $b(\text{\AA})$ | $a(\text{\AA})$          | $b(\text{\AA})$ |
| $\text{Cs}_2\text{PbI}_4/\text{MoSe}_2$ | $1 \times \sqrt{2} / 2 \times \sqrt{7}$  | 6.299                     | 8.908           | 6.588           | 8.715           | 6.443                    | 8.811           |
|                                         | $1 \times \sqrt{5} / 2 \times 4$         | 6.299                     | 14.084          | 6.588           | 13.176          | 6.443                    | 13.630          |
|                                         | $1 \times 1 / 2 \times \sqrt{3}$         | 6.299                     | 6.299           | 6.588           | 5.705           | 6.443                    | 6.002           |
| $\text{Cs}_2\text{PbI}_4/\text{WSe}_2$  | $1 \times \sqrt{2} / 2 \times \sqrt{7}$  | 6.299                     | 8.908           | 6.580           | 8.704           | 6.439                    | 8.806           |
|                                         | $1 \times \sqrt{5} / 2 \times 4$         | 6.299                     | 14.084          | 6.580           | 13.160          | 6.439                    | 13.622          |
| $\text{Cs}_2\text{PbI}_4/\text{MoS}_2$  | $1 \times \sqrt{2} / 2 \times \sqrt{7}$  | 6.299                     | 8.908           | 6.328           | 8.372           | 6.314                    | 8.640           |
|                                         | $\sqrt{2} \times 2 / 3 \times \sqrt{13}$ | 8.907                     | 12.598          | 9.492           | 11.408          | 9.200                    | 12.002          |
| $\text{Cs}_2\text{PbI}_4/\text{WS}_2$   | $1 \times \sqrt{2} / 2 \times \sqrt{7}$  | 6.299                     | 8.908           | 6.365           | 8.419           | 6.332                    | 8.664           |

Table S2. The band gap  $E(\text{eV})$ , electron affinity  $A(\text{eV})$ , and ionization energy  $I(\text{eV})$  of monolayers  $\text{Cs}_2\text{PbI}_4$  and  $\text{MX}_2$  based on HSE+SOC and PBE functional, respectively.

|                                          | $\text{Cs}_2\text{PbI}_4$ | $\text{MoSe}_2$      | $\text{WSe}_2$       | $\text{MoS}_2$       | $\text{WS}_2$        |
|------------------------------------------|---------------------------|----------------------|----------------------|----------------------|----------------------|
| $E(\text{PBE})$                          | 1.83                      | 1.51                 | 1.64                 | 1.74                 | 1.87                 |
| $-A(\text{PBE})$                         | -3.130                    | -3.758               | -3.428               | -4.169               | -3.804               |
| $-I(\text{PBE})$                         | -4.961                    | -5.267               | -5.074               | -5.905               | -5.679               |
| $E(\text{HSE}^{\alpha=0.25}+\text{SOC})$ | 1.62                      | 2.44                 | 2.11                 | 2.42                 | 2.47                 |
| $E(\text{HSE}^{\alpha}+\text{SOC})$      | $1.89^{\alpha=0.35}$      | $1.56^{\alpha=0.07}$ | $1.67^{\alpha=0.15}$ | $1.87^{\alpha=0.10}$ | $2.01^{\alpha=0.15}$ |
| $-A(\text{HSE}^{\alpha}+\text{SOC})$     | -3.521                    | -3.995               | -3.591               | -4.369               | -3.904               |
| $-I(\text{HSE}^{\alpha}+\text{SOC})$     | -5.406                    | -5.555               | -5.262               | -6.237               | -5.920               |
| Experiment <sup>4</sup>                  | 1.86                      | 1.57                 | 1.65                 | 1.90                 | 1.94-1.99            |

Table S3. The band gap (eV),VBM edge (eV) and CBM edge (eV) of monolayers Cs<sub>2</sub>PbI<sub>4</sub> and MX<sub>2</sub> in heterostructures based on HSE+SOC and PBE functional, respectively.

|         | Functional | Cs <sub>2</sub> PbI <sub>4</sub> | MoSe <sub>2</sub> | Cs <sub>2</sub> PbI <sub>4</sub> | WSe <sub>2</sub> | Cs <sub>2</sub> PbI <sub>4</sub> | MoS <sub>2</sub> | Cs <sub>2</sub> PbI <sub>4</sub> | WS <sub>2</sub> |
|---------|------------|----------------------------------|-------------------|----------------------------------|------------------|----------------------------------|------------------|----------------------------------|-----------------|
| Bandgap |            | 2.065                            | 1.488             | 1.892                            | 1.733            | 2.031                            | 1.231            | 1.431                            | 2.054           |
| CBM     | PBE        | 1.857                            | 1.197             | 1.686                            | 1.244            | 2.019                            | 0.940            | 1.266                            | 1.283           |
| VBM     |            | -0.208                           | -0.290            | -0.206                           | -0.489           | -0.011                           | -0.291           | -0.206                           | -0.269          |
| Bandgap |            |                                  |                   | 1.773                            | 1.867            | 1.631                            | 1.519            | 1.622                            | 1.824           |
| CBM     | HSE+SOC    |                                  |                   | 1.552                            | 1.464            | 1.412                            | 1.191            | 1.397                            | 1.535           |
| VBM     |            |                                  |                   | -0.220                           | -0.403           | -0.218                           | -0.329           | -0.225                           | -0.289          |

Table S4. The open-circuit voltage (V<sub>OC</sub>), conduction band offset (CBO) and power conversion efficiency (PCE) of Cs<sub>2</sub>PbI<sub>4</sub>/MSe<sub>2</sub> (M=Mo,W) heterostructures.  $E_d^g$  is donor bandgap based on PBE and HSE+SOC, respectively.

| Functional | Heterostructure                                       | Size                                    | $E_d^g$ | CBO   | V <sub>oc</sub> | PEC (%) |
|------------|-------------------------------------------------------|-----------------------------------------|---------|-------|-----------------|---------|
| PBE        | Cs <sub>2</sub> PbI <sub>4</sub> /MoSe <sub>2</sub>   | $1 \times \sqrt{5} / 2 \times 4$        | 2.065   | 0.660 | 1.405           | 17.1%   |
|            | Cs <sub>2</sub> PbI <sub>4</sub> /WSe <sub>2</sub>    | $1 \times \sqrt{2} / 2 \times \sqrt{7}$ | 1.892   | 0.442 | 1.450           | 21.9%   |
| HSE+SOC    | Cs <sub>2</sub> PbI <sub>4</sub> /MoSe <sub>2</sub> * | $1 \times \sqrt{2} / 2 \times \sqrt{7}$ | 1.885   | 0.474 | 1.111           | 16.8%   |
|            | Cs <sub>2</sub> PbI <sub>4</sub> /WSe <sub>2</sub>    | $1 \times \sqrt{2} / 2 \times \sqrt{7}$ | 1.773   | 0.088 | 1.385           | 23.9%   |

\* represents the data based isolated monolayers.

Table S5. Carrier effective masses  $m_e$  and  $m_h$ , reduced mass  $\mu$ , static dielectric constant  $\epsilon$  and exciton binding energies of Cs<sub>2</sub>PbI<sub>4</sub>/MSe<sub>2</sub> (M=Mo,W) heterostructures. Edg is donor bandgap based on PBE functional.

| Heterostructure                                     | Direction | $m_e$ | $m_h$ | $\mu$ | $\epsilon$ | $E_e$ |
|-----------------------------------------------------|-----------|-------|-------|-------|------------|-------|
| Cs <sub>2</sub> PbI <sub>4</sub> /MoSe <sub>2</sub> | <i>a</i>  | 0.266 | 2.26  | 0.238 | 5.233      | 0.473 |
|                                                     | <i>b</i>  | 0.657 | 0.739 | 0.348 | 5.209      | 0.698 |
| Cs <sub>2</sub> PbI <sub>4</sub> /WSe <sub>2</sub>  | <i>a</i>  | 0.598 | 6.419 | 0.547 | 4.905      | 1.237 |
|                                                     | <i>b</i>  | 1.645 | 0.196 | 0.175 | 5.014      | 0.379 |
| Cs <sub>2</sub> PbI <sub>4</sub> /MoS <sub>2</sub>  | <i>a</i>  | 0.476 | 0.591 | 0.264 | 5.035      | 0.567 |
|                                                     | <i>b</i>  | 0.471 | 0.958 | 0.316 | 5.107      | 0.659 |
| Cs <sub>2</sub> PbI <sub>4</sub> /WS <sub>2</sub>   | <i>a</i>  | 0.854 | 0.694 | 0.383 | 4.758      | 0.920 |
|                                                     | <i>b</i>  | 0.089 | 0.733 | 0.794 | 4.787      | 1.885 |

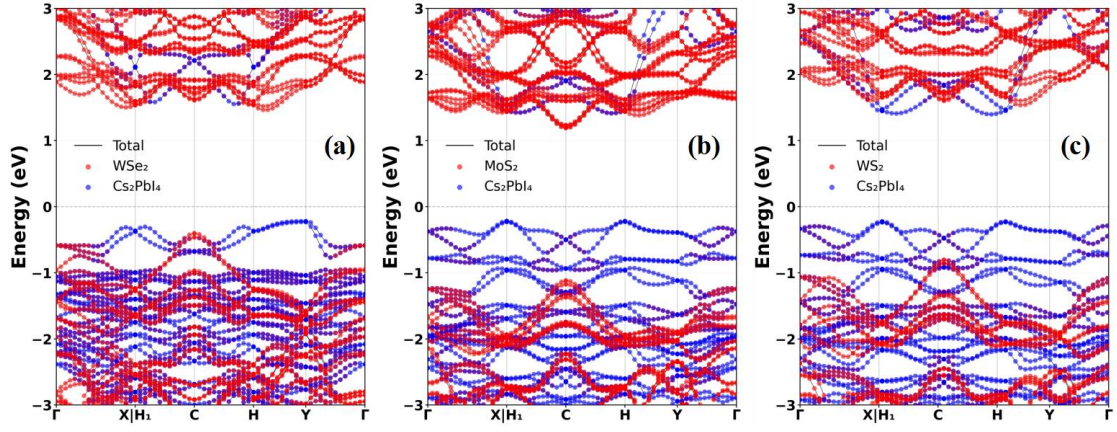

Fig.S1. Projected band structures of heterostructures (a)  $\text{Cs}_2\text{PbI}_4/\text{WSe}_2$ , (b)  $\text{Cs}_2\text{PbI}_4/\text{MoS}_2$  and (c)  $\text{Cs}_2\text{PbI}_4/\text{WS}_2$  based on HSE+SOC.

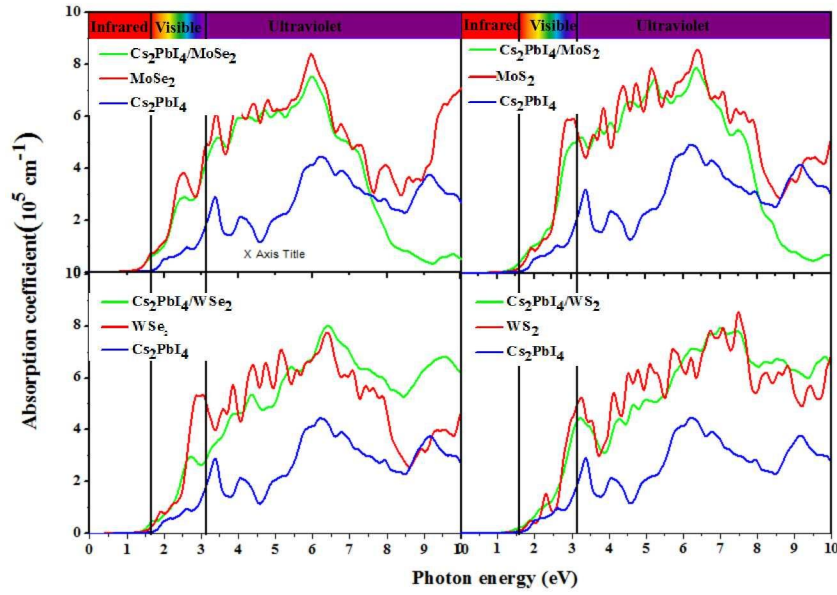

Fig. S2. Optical absorption of monolayer  $\text{Cs}_2\text{PbI}_4$ ,  $\text{MX}_2$  ( $\text{M}=\text{Mo}, \text{W}; \text{X}=\text{Se}, \text{S}$ ) and four stable heterostructures  $\text{Cs}_2\text{PbI}_4/\text{MoSe}_2$ ,  $\text{Cs}_2\text{PbI}_4/\text{WSe}_2$ ,  $\text{Cs}_2\text{PbI}_4/\text{MoS}_2$  and  $\text{Cs}_2\text{PbI}_4/\text{WS}_2$ .

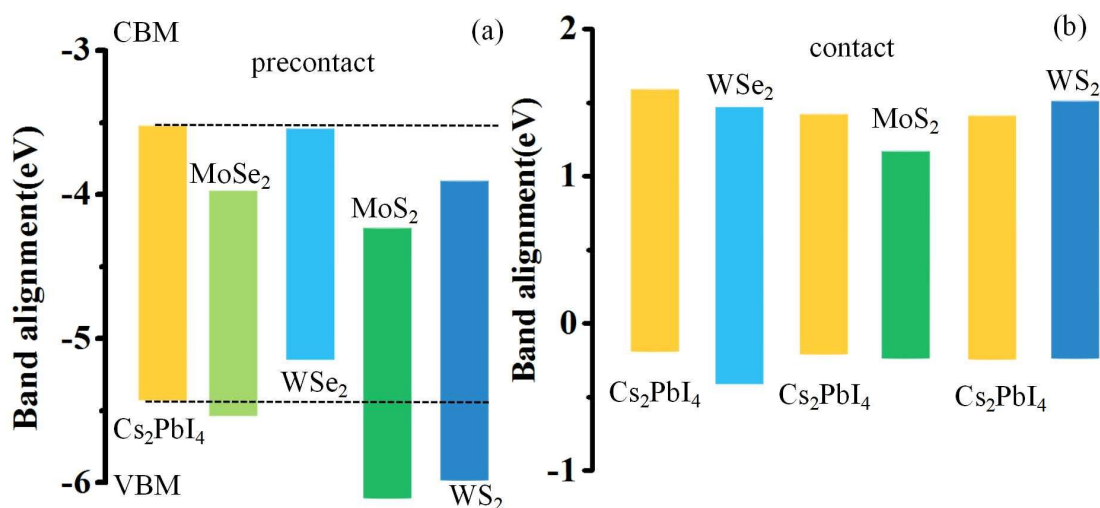

Fig. S3. Band alignments of monolayers  $\text{Cs}_2\text{PbI}_4$ ,  $\text{WSe}_2$ ,  $\text{MoSe}_2$ , and  $\text{MoS}_2$  in precontact state (a) and contact state (b) based on HSE+SOC functional.

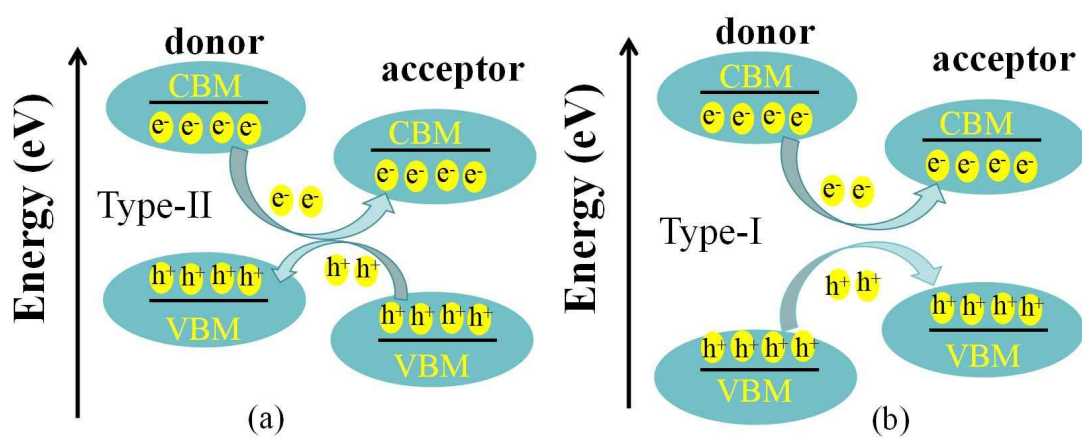

Fig. S4. The mechanism for electron-hole pair separation in heterostructures, (a) Type-II, (b) Type-I.

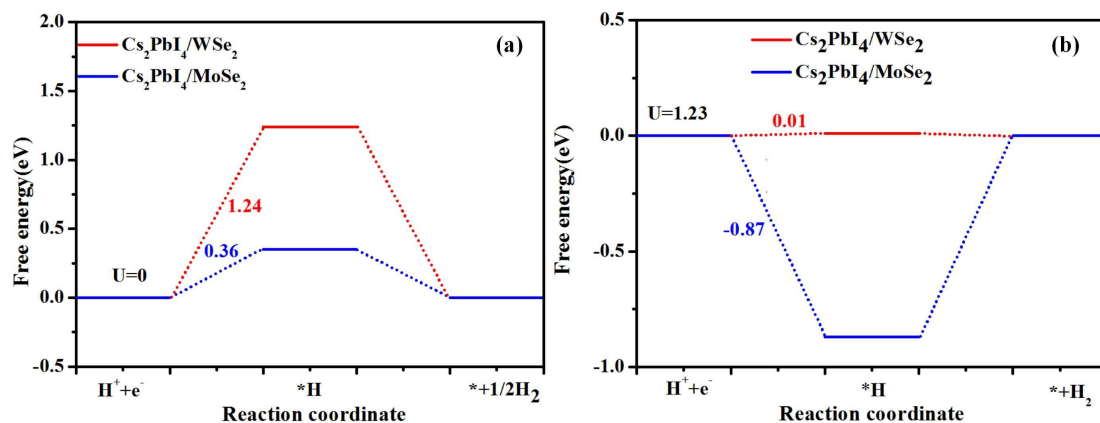

Fig. S5. Gibbs free energy diagram for HER at  $pH=0$  under zero cell potential  $U=0$  and equilibrium potential  $U=1.23$  V.

## References

- 1) J. Heyd and G. E. Scuseria, *J. Chem. Phys.*, 2004, 120, 7274– 7280.
- 2) J. K. Nørskov, J. Rossmeisl, A. Logadottir, L. Lindqvist, J. R. Kitchin, T. Bligaard and H. Jonsson, *J. Phys. Chem. B.*, 2004, 108, 17886–17892.
- 3) J. K. Nørskov, T. Bligaard, A. Logadottir, J. Kitchin, J. G. Chen, S. Pandelov and U. Stimming, *J. Electrochem Soc*, 2005, 152, J23.
- 4) C. H. Chang, X. F. Fan, S. H. Lin, J. L. Kuo, *Phys. Rev. B.* 2013, 88, 195420.
